# Supplementary material for: A new S = 1/2 stacked kagomé lattice compound showing two successive ferromagnetic transitions
Source: Royal Society of Chemistry journal article supplement (doi:10.1039/d4dt02617a), 2024-01-01
Supplement: d4dt02617a1.pdf [file d4dt02617a1.pdf]

## Supporting Information

### **A new $S = 1/2$ stacked kagomé lattice compound showing two successive ferromagnetic transitions**

Tianyu Zhu<sup>a,b</sup>, Zhiying Zhao<sup>a</sup>, Meiyang Cui<sup>a</sup>, Wenhao Zhang<sup>a,b</sup> and Zhangzhen He<sup>\*,a</sup>

<sup>a</sup> State Key Laboratory of Structural Chemistry, Fujian Institute of Research on the Structure of Matter, Chinese Academy of Sciences, Fuzhou 350002, P. R. China

<sup>b</sup> University of Chinese Academy of Sciences, Beijing 100049, P. R. China

\*E-mail: hezz@fjirsm.ac.cn

**Fig. S1.** The energy-dispersive spectrometry elemental analyses of  $\text{Na}_6\text{V}_7(\text{SeO}_3)_8\text{O}_6\text{F}_6$ .

**Fig. S2.** The heat capacity ( $C_p$ ) measured under 0 T, where the solid red line represents the simulated lattice contribution ( $C_L$ ).

**Table S1.** The bond lengths (Å) of  $\text{Na}_6\text{V}_7(\text{SeO}_3)_8\text{O}_6\text{F}_6$ .

**Table S2.** The bond angles (°) of  $\text{Na}_6\text{V}_7(\text{SeO}_3)_8\text{O}_6\text{F}_6$ .

**Table S3.** Atomic coordinates ( $\times 10^4$ ) and equivalent isotropic displacement parameters ( $\text{Å}^2 \times 10^3$ ) for  $\text{Na}_6\text{V}_7(\text{SeO}_3)_8\text{O}_6\text{F}_6$ .

**Table S4.** Anisotropic displacement parameters ( $\text{Å}^2 \times 10^3$ ) for  $\text{Na}_6\text{V}_7(\text{SeO}_3)_8\text{O}_6\text{F}_6$ .

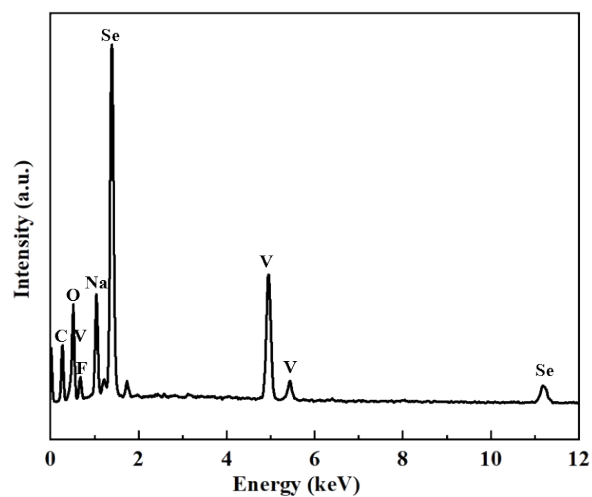

**Fig. S1.** The energy-dispersive spectrometry (EDS) elemental analyses of  $\text{Na}_6\text{V}_7(\text{SeO}_3)_8\text{O}_6\text{F}_6$ .

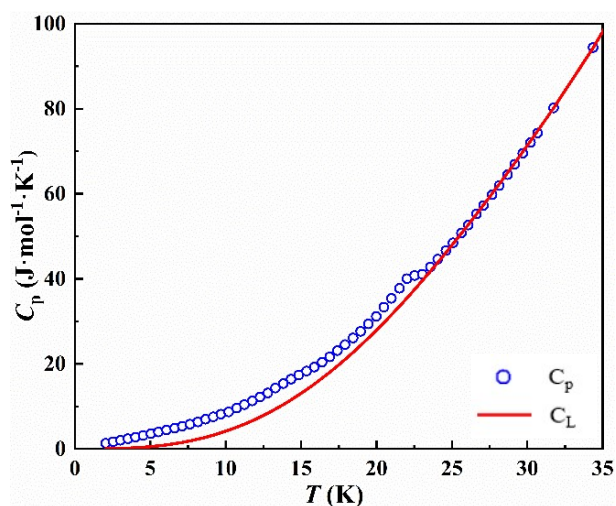

**Fig. S2.** The heat capacity ( $C_p$ ) measured under 0 T, where the solid red line represents the simulated lattice contribution ( $C_L$ ).

**Table S1.** The bond lengths (Å) of Na<sub>6</sub>V<sub>7</sub>(SeO<sub>3</sub>)<sub>8</sub>O<sub>6</sub>F<sub>6</sub>.

| Bond                | Dist.     | Bond                | Dist.      |
|---------------------|-----------|---------------------|------------|
| Na1-O1              | 2.363(11) | V2-F1 <sup>1</sup>  | 1.973(15)  |
| Na1-O2 <sup>6</sup> | 2.424(13) | V2-F1 <sup>12</sup> | 1.7821(15) |
| Na1-O2 <sup>9</sup> | 2.775(12) | V2-F1 <sup>13</sup> | 1.7821(15) |
| Na1-O3 <sup>9</sup> | 2.446(12) | V2-F1 <sup>10</sup> | 1.973(15)  |
| Na1-F1              | 2.067(16) | V2-F1               | 1.7821(14) |
| Na1-F1 <sup>5</sup> | 2.537(16) | V2-F1 <sup>5</sup>  | 1.973(15)  |
| V1-O1 <sup>5</sup>  | 1.997(10) | Se1-O5 <sup>3</sup> | 1.696(10)  |
| V1-O2 <sup>6</sup>  | 2.097(11) | Se1-O5 <sup>4</sup> | 1.696(10)  |
| V1-O3               | 1.979(9)  | Se1-O5              | 1.696(10)  |
| V1-O4               | 1.734(10) | Se2-O1              | 1.729(10)  |
| V1-O4 <sup>7</sup>  | 1.957(10) | Se2-O2              | 1.702(10)  |
| V1-O5               | 1.971(10) | Se2-O3              | 1.713(8)   |

Symmetry transformations used to generate equivalent atoms:

<sup>1</sup>+Y,1-X+Y,-1/2+Z;<sup>2</sup>+X,+Y,-1+Z;<sup>3</sup>1-Y,1+X-Y,+Z;<sup>4</sup>+Y-X,1-X,+Z;<sup>5</sup>1-Y+X,+X,-1/2+Z;<sup>6</sup>1-Y+X,+X,1/2+Z;<sup>7</sup>1-X,2-Y,1/2+Z;<sup>8</sup>+Y,1-X+Y,1/2+Z;<sup>9</sup>+X,+Y,1+Z;<sup>10</sup>2-X,2-Y,-1/2+Z;<sup>11</sup>2-X,2-Y,1/2+Z;<sup>12</sup>1+Y-X,2-X,+Z;<sup>13</sup>2-Y,1+X-Y,+Z

**Table S2** The bond angles (°) of Na<sub>6</sub>V<sub>7</sub>(SeO<sub>3</sub>)<sub>8</sub>O<sub>6</sub>F<sub>6</sub>.

| Angle                                | (°)      | Angle                                 | (°)      |
|--------------------------------------|----------|---------------------------------------|----------|
| O2-Se2-O3                            | 97.3(4)  | F1 <sup>11</sup> -V2-F1 <sup>5</sup>  | 173.8(5) |
| O2-Se2-O1                            | 101.0(5) | F1 <sup>10</sup> -V2-F1 <sup>11</sup> | 82.7(7)  |
| O3-Se2-O1                            | 99.6(4)  | F1 <sup>10</sup> -V2-F1 <sup>12</sup> | 101.9(4) |
| O5-Se1-O5 <sup>3</sup>               | 100.7(4) | F1 <sup>10</sup> -V2-F1 <sup>2</sup>  | 173.8(5) |
| O5 <sup>4</sup> -Se1-O5 <sup>3</sup> | 100.7(4) | F1-V2-F1 <sup>12</sup>                | 173.8(5) |
| O5 <sup>4</sup> -Se1-O5              | 100.7(4) | F1-V2-F1 <sup>5</sup>                 | 101.9(4) |
| O5-V1-O2 <sup>6</sup>                | 85.2(4)  | F1-V2-F1 <sup>11</sup>                | 82.7(7)  |
| O5-V1-O3                             | 167.2(4) | F1 <sup>12</sup> -V2-F1 <sup>5</sup>  | 73.25(8) |
| O5-V1-O1 <sup>5</sup>                | 93.7(4)  | F1 <sup>12</sup> -V2-F1 <sup>2</sup>  | 73.25(8) |
| O3-V1-O2 <sup>6</sup>                | 82.1(4)  | F1 <sup>11</sup> -V2-F1 <sup>2</sup>  | 101.9(4) |
| O3-V1-O1 <sup>5</sup>                | 85.6(4)  | F1 <sup>10</sup> -V2-F1 <sup>5</sup>  | 101.9(4) |
| O4-V1-O5                             | 93.1(4)  | F1 <sup>2</sup> -V2-F1 <sup>5</sup>   | 73.25(8) |
| O4 <sup>7</sup> -V1-O5               | 85.5(4)  | F1-V2-F1 <sup>2</sup>                 | 101.9(4) |
| O4-V1-O2 <sup>6</sup>                | 177.7(4) | F1 <sup>11</sup> -V2-F1 <sup>12</sup> | 101.9(4) |
| O4 <sup>7</sup> -V1-O2 <sup>6</sup>  | 87.5(4)  | F1-V2-F1 <sup>10</sup>                | 82.7(7)  |
| O4-V1-O3                             | 99.6(4)  | Se1-O5-V1                             | 124.2(6) |

|                                      |           |                                       |          |
|--------------------------------------|-----------|---------------------------------------|----------|
| O4 <sup>7</sup> -V1-O3               | 93.1(4)   | Se2-O2-V1 <sup>2</sup>                | 122.8(5) |
| O4-V1-O4 <sup>7</sup>                | 93.90(14) | Se2-O2-Na1 <sup>2</sup>               | 111.7(5) |
| O4 <sup>7</sup> -V1-O1 <sup>5</sup>  | 170.8(4)  | Se2-O2-Na1 <sup>1</sup>               | 93.2(4)  |
| O4-V1-O1 <sup>5</sup>                | 95.3(4)   | V1 <sup>2</sup> -O2-Na1 <sup>1</sup>  | 96.6(4)  |
| O1 <sup>5</sup> -V1-O2 <sup>6</sup>  | 83.3(4)   | V1 <sup>2</sup> -O2-Na1 <sup>2</sup>  | 122.5(5) |
| O2 <sup>6</sup> -Na1-O2 <sup>8</sup> | 146.4(5)  | Na1 <sup>2</sup> -O2-Na1 <sup>1</sup> | 97.5(5)  |
| O2 <sup>6</sup> -Na1-O3 <sup>8</sup> | 101.2(4)  | Se2-O3-V1                             | 129.3(5) |
| O2 <sup>6</sup> -Na1-F1 <sup>5</sup> | 72.8(4)   | Se2-O3-Na1 <sup>1</sup>               | 105.3(4) |
| O3 <sup>8</sup> -Na1-O2 <sup>8</sup> | 58.4(3)   | V1-O3-Na1 <sup>1</sup>                | 113.0(4) |
| O3 <sup>8</sup> -Na1-F1 <sup>5</sup> | 151.2(5)  | V1-O4-V1 <sup>14</sup>                | 155.7(5) |
| F1 <sup>5</sup> -Na1-O2 <sup>8</sup> | 138.2(4)  | Na1-F1-Na1 <sup>9</sup>               | 116.2(5) |
| F1-Na1-O2 <sup>6</sup>               | 137.4(5)  | V2-F1-Na1                             | 99.6(6)  |
| F1-Na1-O2 <sup>8</sup>               | 73.3(4)   | V2 <sup>13</sup> -F1-Na1              | 142.6(7) |
| F1-Na1-O3 <sup>8</sup>               | 89.8(5)   | V2 <sup>13</sup> -F1-Na1 <sup>9</sup> | 80.5(4)  |
| F1-Na1-F1 <sup>5</sup>               | 77.9(4)   | V2-F1-Na1 <sup>9</sup>                | 135.5(7) |
| F1-Na1-O1                            | 115.9(5)  | V2-F1-V2 <sup>13</sup>                | 86.8(5)  |
| O1-Na1-O2 <sup>6</sup>               | 101.4(4)  | Se2-O1-V1 <sup>9</sup>                | 124.2(5) |
| O1-Na1-O2 <sup>8</sup>               | 63.4(3)   | Se2-O1-Na1                            | 121.6(5) |
| O1-Na1-O3 <sup>8</sup>               | 103.7(4)  | V1 <sup>9</sup> -O1-Na1               | 114.2(5) |
| O1-Na1-F1 <sup>5</sup>               | 105.1(5)  |                                       |          |

Symmetry transformations used to generate equivalent atoms:

<sup>1</sup>+X,+Y,-1+Z;<sup>2</sup>+Y,1-X+Y,-1/2+Z;<sup>3</sup>+Y-X,1-X,+Z;<sup>4</sup>1-Y,1+X-Y,+Z;<sup>5</sup>1-Y+X,+X,-1/2+Z;<sup>6</sup>1-Y+X,+X,1/2+Z;<sup>7</sup>1-X,2-Y,1/2+Z;<sup>8</sup>+X,+Y,1+Z;<sup>9</sup>+Y,1-X+Y,1/2+Z;<sup>10</sup>2-Y,1+X-Y,+Z;<sup>11</sup>1+Y-X,2-X,+Z;<sup>12</sup>2-X,2-Y,-1/2+Z;<sup>13</sup>2-X,2-Y,1/2+Z;<sup>14</sup>1-X,2-Y,-1/2+Z

**Table S3** Atomic coordinates (x 10<sup>4</sup>) and equivalent isotropic displacement parameters

U(eq) (Å<sup>2</sup> x 10<sup>3</sup>) for Na<sub>6</sub>V<sub>7</sub>(SeO<sub>3</sub>)<sub>8</sub>O<sub>6</sub>F<sub>6</sub>.

| Atom | x          | y          | z        | U(eq)    |
|------|------------|------------|----------|----------|
| Na1  | 8076(6)    | 10604(5)   | 8040(20) | 25.5(16) |
| V1   | 5539.7(16) | 9409.9(17) | 2660(15) | 6.3(4)   |
| V2   | 10000      | 10000      | 7780(20) | 35(2)    |
| Se1  | 3333.33    | 6666.67    | 2358(14) | 4.7(5)   |
| Se2  | 7803.4(9)  | 12240.0(9) | 2718(12) | 2.9(3)   |
| O1   | 8399(8)    | 12334(8)   | 5770(20) | 6.3(18)  |
| O2   | 9049(9)    | 12727(9)   | 840(20)  | 9(2)     |
| O3   | 7205(7)    | 10736(7)   | 2150(20) | 3.7(19)  |
| O4   | 4861(8)    | 9647(8)    | 0(20)    | 6.8(19)  |

|    |          |           |           |       |
|----|----------|-----------|-----------|-------|
| O5 | 4030(8)  | 8019(9)   | 3860(20)  | 8(2)  |
| F1 | 9542(11) | 10750(10) | 10007(19) | 70(6) |

**Table S4.** Anisotropic displacement parameters ( $\text{\AA}^2 \times 10^3$ ) for  $\text{Na}_6\text{V}_7(\text{SeO}_3)_8\text{O}_6\text{F}_6$ .

| Atom | $U_{11}$ | $U_{22}$ | $U_{33}$ | $U_{23}$ | $U_{13}$ | $U_{12}$ |
|------|----------|----------|----------|----------|----------|----------|
| Na1  | 43(4)    | 8(3)     | 9(4)     | 2(3)     | -2(3)    | 1(3)     |
| V1   | 4.1(9)   | 4.6(9)   | 9.8(10)  | 2.4(12)  | 3.0(12)  | 2.0(7)   |
| V2   | 36(3)    | 36(3)    | 35(6)    | 0        | 0        | 17.8(16) |
| Se1  | 5.1(6)   | 5.1(6)   | 3.8(13)  | 0        | 0        | 2.6(3)   |
| Se2  | 2.9(5)   | 2.5(5)   | 3.1(6)   | -0.2(7)  | 0.6(7)   | 1.3(4)   |
| O1   | 7(2)     | 6(2)     | 6(2)     | 0.3(13)  | -0.6(13) | 3.1(15)  |
| O2   | 9(2)     | 9(2)     | 8(2)     | -0.4(13) | 0.7(13)  | 4.4(15)  |
| O3   | 4(2)     | 3(2)     | 4(2)     | 0.1(13)  | 0.3(13)  | 1.8(15)  |
| O4   | 6(2)     | 7(2)     | 7(2)     | 0.0(13)  | 0.4(13)  | 3.2(15)  |
| O5   | 7(5)     | 5(4)     | 11(5)    | 1(4)     | -1(4)    | 2(4)     |
| F1   | 27(6)    | 26(6)    | 162(19)  | 28(9)    | 11(9)    | 18(5)    |
